# Supplementary material
Source: Springer Nature journal article supplement (https://www.springermedizin.de/resource/supplementary/13013_2009_142_MOESM7_ESM.pdf/9631256)
Supplement: MOESM7 [file 9631256]

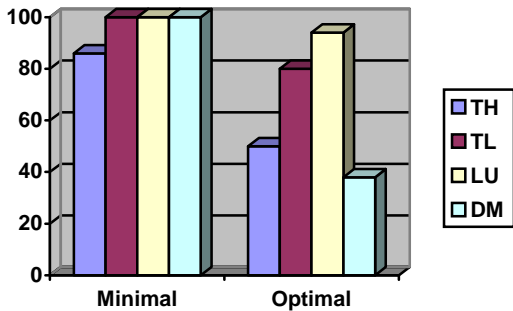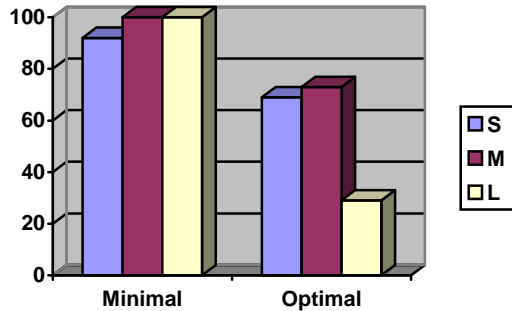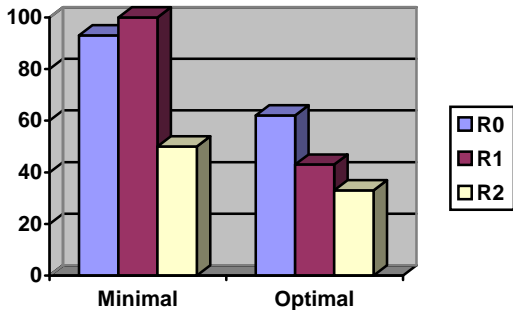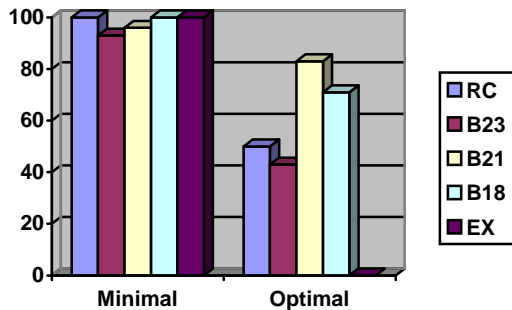

**Scoliosis type:** TH: Thoracic; TL: Thoracolumbar; LU: Lumbar; DM: Double-major – **Scoliosis magnitude:** S: 25-30°; M: 31-35°; L: 36-40° – **Risser test:** R0: 0; R1: 1; R2: 2 – **Treatment:** RC: Risser cast; B23: Brace 23 hours per day; B21: Brace 21 hours per day; B18: Brace 18 hours per day; EX: Exercises.
